# Supplementary material for: Pros and cons of gastric bypass surgery in individuals with obesity and type 2 diabetes: nationwide, matched, observational cohort study
Source: PubMed Central journal article supplement — BMJ Open. 2019 Jan 15;9(1):e023882. doi: 10.1136/bmjopen-2018-023882 (PMC6340417; doi:10.1136/bmjopen-2018-023882), 2019-01-15
Supplement: bmjopen-2018-023882supp001.pdf [file bmjopen-2018-023882supp001.pdf]

## SUPPLEMENTARY MATERIAL

### Table of contents

- Flowchart – patient selection
- Methods – database linkages
- Table S1. ICD-10 codes
- Table S2. Risk estimates for men and women

### Flowchart

Selection of our data from Scandinavian Obesity Surgery Register (SOReg) before merging with data from the National Diabetes Registry (NDR).

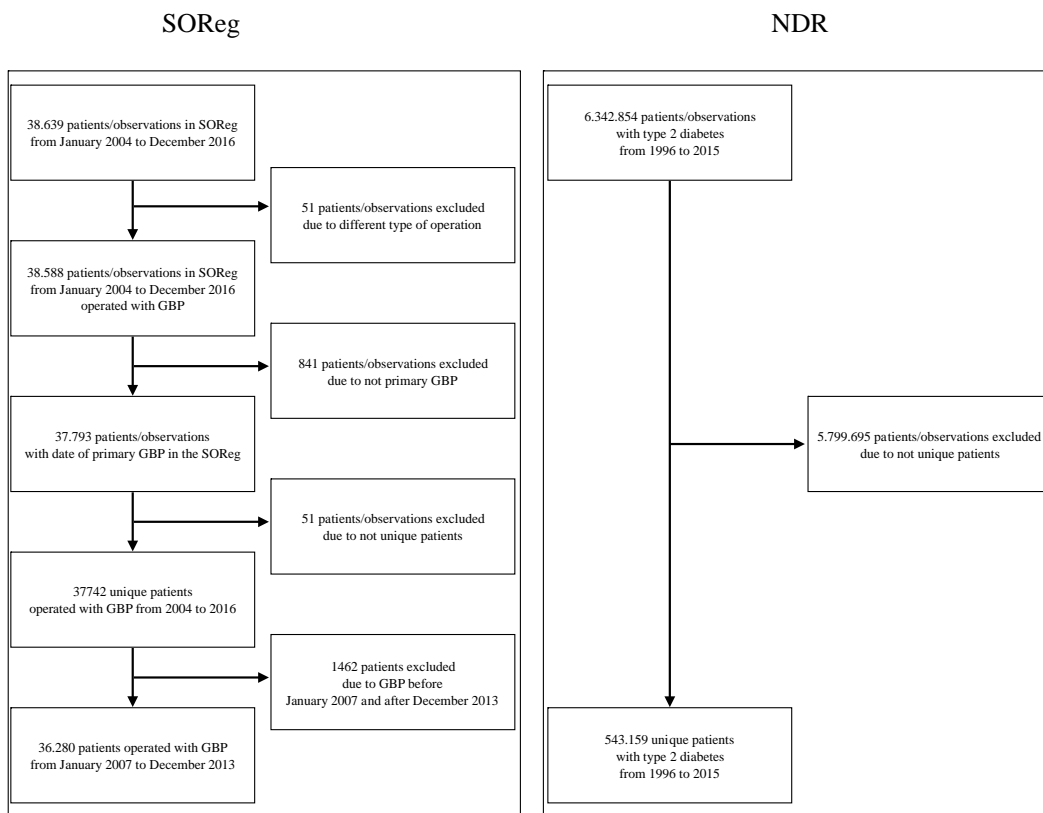

Merging the two databases led to our study population of 5,321 patients in the SOReg who had T2DM and had undergone GBP, and 5,321 matched control patients in the NDR.

### **Methods – database linkages**

This study is based on data from the NDR and SOReg. Both registers are linked to Statistics Sweden at the National Board of Health and Welfare, which also stores data in the Swedish Inpatient Register (1997-2015).

We filed an application with our data and personal identity numbers [SOReg (2007-2013) & NDR (1996-2015)] to the National Board of Health and Welfare, from which all personal identity numbers have been identified and replaced by serial numbers. The coded data from the National Board of Health and Welfare were subsequently forwarded to Statistics Sweden for linkage with the Inpatient Register and LISA Database, which provides socioeconomic data. The linked data were then returned to us for validation and analysis.

**Table S1: Pre-index diagnoses and outcomes after GBP**

Diagnoses before and after gastric bypass surgery (index date) until December 2015 according to ICD-10.

| <b>Diagnosis</b>                    | <b>ICD-10</b>                                                                                  | <b>Variable origin</b>     | <b>Registration period</b> |
|-------------------------------------|------------------------------------------------------------------------------------------------|----------------------------|----------------------------|
| Acute Myocardial infarction         | <i>I21</i>                                                                                     | Swedish Inpatient Register | 2007-2015                  |
| Coronary heart disease              | <i>I20-25</i>                                                                                  | Swedish Inpatient Register | 2007-2015                  |
| Stroke                              | <i>I61-64</i>                                                                                  | Swedish Inpatient Register | 2007-2015                  |
| Cardiovascular disease              | <i>I21, I61-64</i>                                                                             | Swedish Inpatient Register | 2007-2015                  |
| Atrial fibrillation                 | <i>I48</i>                                                                                     | Swedish Inpatient Register | 2007-2015                  |
| Heart failure                       | <i>I50</i>                                                                                     | Swedish Inpatient Register | 2007-2015                  |
| Valvular heart disease              | <i>I05-09, I34-37, Q22, Q23</i>                                                                | Swedish Inpatient Register | 2007-2015                  |
| Liver disease                       | <i>K70-74</i>                                                                                  | Swedish Inpatient Register | 2007-2015                  |
| Kidney disease                      | <i>V42A, V45B, V56A, V56W, Z940, Z491, Z492, Z992, N17-19, N99</i>                             | Swedish Inpatient Register | 2007-2015                  |
| Hyperglycemia                       | <i>E100, E101, E110, E111, E120, E121, E130, E131, E140, E141, R739</i>                        | Swedish Inpatient Register | 2007-2015                  |
| Hypoglycemia (with or without coma) | <i>E100, E106A, E110, E110C, E110X, E116A, E120, E130, E140, E159, E160, E161W, E162, R402</i> | Swedish Inpatient Register | 2007-2015                  |
| Cancer                              | <i>C0-9</i>                                                                                    | Swedish Inpatient Register | 2007-2015                  |

|                                                 |                                                                                  |                            |           |
|-------------------------------------------------|----------------------------------------------------------------------------------|----------------------------|-----------|
| Dementia                                        | <i>G300, G301, G308, G309, G31, F00-03</i>                                       | Swedish Inpatient Register | 2007-2015 |
| Psychiatric disorders                           | <i>F11-19, F20-29, F30-39, F50, F55, F40-F43, F60, F61, F68, F69, F99</i>        | Swedish Inpatient Register | 2007-2015 |
| Alcohol abuse                                   | <i>F10</i>                                                                       | Swedish Inpatient Register | 2007-2015 |
| Anemia                                          | <i>D508-9, D51.0,3,8, D520</i>                                                   | Swedish Inpatient Register | 2007-2015 |
| Malnutrition                                    | <i>E15-16, E51.2, E42-44, E46, E50-64, G63.3-4, G62.9, K91.1-2, M81.3, M83.2</i> | Swedish Inpatient Register | 2007-2015 |
| Bleeding                                        | <i>T81.0</i>                                                                     | Swedish Inpatient Register | 2007-2015 |
| Deep vein thrombosis and pulmonary embolism     | <i>I80.0-9, I26, I81</i>                                                         | Swedish Inpatient Register | 2007-2015 |
| Amputation                                      | <i>NHQ09, 11-14, 16, 17, 99, NGQ09, 19, 99, NFQ19, 99</i>                        | Swedish Inpatient Register | 2007-2015 |
| Bowel obstruction                               | <i>K56, K45</i>                                                                  | Swedish Inpatient Register | 2007-2015 |
| Gastrointestinal leakage                        | <i>T84.4, K65.0, K63.1</i>                                                       | Swedish Inpatient Register | 2007-2015 |
| Pulmonary complications                         | <i>J18.0-9, J69.0, J80, J98.1</i>                                                | Swedish Inpatient Register | 2007-2015 |
| Wound complications                             | <i>T81.3-4, K43.0-9</i>                                                          | Swedish Inpatient Register | 2007-2015 |
| Gastrointestinal ulcer and reflux               | <i>K21, K22.1-3, K25-26, K28</i>                                                 | Swedish Inpatient Register | 2007-2015 |
| Hernia                                          | <i>K40-43</i>                                                                    | Swedish Inpatient Register | 2007-2015 |
| Gallstone, gallbladder disease and pancreatitis | <i>K80-85</i>                                                                    | Swedish Inpatient Register | 2007-2015 |
| Gastrointestinal surgery not                    | All the operative diagnoses with                                                 | Swedish Inpatient Register | 2007-2015 |

|                              |                                                                  |                                                      |           |
|------------------------------|------------------------------------------------------------------|------------------------------------------------------|-----------|
| GBP                          | "J" except for gastric operation                                 | Register                                             |           |
| Plastic surgery              | <i>QBE, QBJ, QCJ05, QDJ05, QAJ35</i>                             | Swedish Inpatient Register                           | 2007-2015 |
| Abdominal pain               | <i>R10.1-4</i>                                                   | Swedish Inpatient Register                           | 2007-2015 |
| All-cause mortality          | Everyone in the Cause of Death Register                          | Cause of Death Register                              | 2007-2015 |
| Fatal coronary heart disease | <i>I20-24</i> and entered in the Cause of Death Register         | Swedish Inpatient Register & Cause of Death Register | 2007-2015 |
| Fatal cardiovascular disease | <i>I20-24, I61-64</i> and entered in the Cause of Death Register | Swedish Inpatient Register & Cause of Death Register | 2007-2015 |

**Table S2: Risk estimates for men and women (Cox proportional hazards regression)**

| <b>Outcome</b>               | <b>Men<br/>HR with 95% CI<br/>(n=4024)</b> | <b>Women<br/>HR with 95% CI<br/>(n=6618)</b> | <b>p-value</b> |
|------------------------------|--------------------------------------------|----------------------------------------------|----------------|
| All-cause mortality          | 0.58 (0.45, 0.74)                          | 0.46 (0.35, 0.60)                            | 0.2091         |
| Coronary heart disease       | 1.14 (0.90, 1.44)                          | 1.12 (0.88, 1.42)                            | 0.9011         |
| Cardiovascular disease       | 0.63 (0.44, 0.92)                          | 0.69 (0.49, 0.96)                            | 0.7614         |
| Fatal coronary heart disease | 0.42 (0.24, 0.73)                          | 0.25 (0.12, 0.54)                            | 0.2853         |
| Fatal cardiovascular disease | 0.60 (0.32, 1.14)                          | 0.13 (0.05, 0.36)                            | 0.0118         |
| Acute myocardial infarction  | 0.55 (0.32, 0.92)                          | 0.56 (0.35, 0.90)                            | 0.9522         |
| Stroke                       | 0.67 (0.32, 1.12)                          | 0.88 (0.55, 1.41)                            | 0.4429         |
| Atrial fibrillation          | 1.13 (0.86, 1.47)                          | 0.72 (0.53, 0.98)                            | 0.0313         |
| Heart failure                | 0.63 (0.46, 0.86)                          | 0.35 (0.24, 0.51)                            | 0.0201         |
| Valvular heart disease       | 0.83 (0.38, 1.84)                          | 0.49 (0.21, 1.13)                            | 0.3645         |
| Hyperglycemia                | 0.22 (0.09, 0.53)                          | 0.40 (0.23, 0.69)                            | 0.2624         |
| Hypoglycemia with coma       | 0.79 (0.39, 1.63)                          | 1.21 (0.71, 2.05)                            | 0.3490         |
| Dementia                     | 0.73 (0.19, 2.86)                          | 0.00 (.,.)                                   | 0.9991         |
| Kidney disease               | 0.84 (0.28, 2.54)                          | 0.37 (0.12, 1.13)                            | 0.2995         |
| Amputation                   | 0.82 (0.36, 1.85)                          | 0.16 (0.04, 0.72)                            | 0.0613         |
| Cancer                       | 1.02 (0.69, 1.51)                          | 0.69 (0.53, 0.90)                            | 0.1068         |
| Psychiatric disorder         | 1.02 (0.76, 1.37)                          | 1.51 (1.23, 1.85)                            | 0.0289         |
| Alcohol abuse                | 2.87 (1.98, 4.15)                          | 2.94 (1.85, 4.69)                            | 0.9298         |
| Liver diseases               | 0.53 (0.25, 1.13)                          | 0.92 (0.49, 1.73)                            | 0.2731         |
| Anemia                       | 1.96 (0.96, 4.01)                          | 1.90 (1.24, 2.90)                            | 0.9390         |

| <b>Outcome</b>                                  | <b>Men<br/>HR with 95% CI<br/>(n=4024)</b> | <b>Women<br/>HR with 95% CI<br/>(n=6618)</b> | <b>p-value</b> |
|-------------------------------------------------|--------------------------------------------|----------------------------------------------|----------------|
| Bleeding                                        | 9.74 (4.69, 20.22)                         | 5.50 (3.26, 9.29)                            | 0.2110         |
| Deep vein thrombosis and pulmonary embolism     | 1.10 (0.59, 2.03)                          | 0.96 (0.60, 1.55)                            | 0.7455         |
| Bowel obstruction                               | 6.17 (3.33, 11.46)                         | 12.10 (7.10, 20.64)                          | 0.1035         |
| Gastrointestinal leakage                        | 5.28 (1.55, 18.01)                         | 5.73 (1.96, 16.79)                           | 0.9217         |
| Malnutrition                                    | 2.72 (1.59, 4.67)                          | 2.86 [1.83, 4.47]                            | 0.8879         |
| Pulmonary complications                         | 0.96 (0.59, 1.56)                          | 0.78 [0.54, 1.12]                            | 0.4915         |
| Wound complications                             | 4.70 (2.79, 7.90)                          | 3.12 [2.36, 4.13]                            | 0.1743         |
| Gastrointestinal ulcer and reflux               | 5.57 (3.49, 8.89)                          | 5.28 (3.36, 8.31)                            | 0.8719         |
| Hernia                                          | 3.53 (2.19, 5.69)                          | 2.47 (1.83, 3.33)                            | 0.2136         |
| Gallstone, gallbladder disease and pancreatitis | 2.33 (1.59, 3.41)                          | 2.56 (1.99, 3.30)                            | 0.6810         |
| Gastrointestinal surgery (not gastric bypass)   | 9.93 (8.35, 11.80)                         | 7.13 (6.37, 7.98)                            | 0.0015         |
| Plastic surgery                                 | 16.96 (6.84, 42.07)                        | 20.73 (12.67, 33.92)                         | 0.7024         |
| Abdominal pain                                  | 7.22 (4.64, 11.24)                         | 5.12 (4.08, 6.41)                            | 0.1703         |
